# Supplementary material for: Aeroelastic Tailoring of Wind Turbine Rotors Using High-Fidelity Multidisciplinary Design Optimization
Source: Copernicus journal article supplement (doi:10.5194/wes-2023-10), 2023-02-21
Supplement: Supplementary file [file wes-2023-10-AC1-supplement.pdf]

Aeroelastic Tailoring of Wind Turbine Rotors Using High-Fidelity  
Multidisciplinary Design Optimization  
*Wind Energy Science*  
Manuscript ID: WES-2023-10

Marco Mangano, Sicheng He, Yingqian Liao, Denis-Gabriel Caprace, Andrew Ning,  
and Joaquim R. R. A. Martins

## Community Comments and Response

**Comment 1:** [...] Maybe you could extend the sentence about Horcas et al. (2022) slightly to also reflect that different BEM model implementations can generate different results, and that models covering a range of aerodynamic fidelities have been evaluated in Horcas et al (2022)?

**Response:** Thank you for the insightful comment, this is an important clarification on modeling consistency. We expanded our comment on Horcas et al. (2022) to mention the broader scope of the paper and the impact of implementation differences in BEM results.

The manuscript changes to address this comment are highlighted in green.
